# Supplementary material
Source: PubMed Central journal article supplement (PMC5027885)
Supplement: NIHMS788178-supplement-03.pdf [file NIHMS788178-supplement-03.pdf]

1 **Supplemental Table 1.** Details for antibodies used in western analyses are below:

| <b>Protein</b>                 | <b>Vendor</b>                                      | <b>Catalog number</b> | <b>Host</b> |
|--------------------------------|----------------------------------------------------|-----------------------|-------------|
| KCNJ5                          | Sigma Aldrich                                      | HPA017353             | Rabbit      |
| CYP11B2                        | Developed by Dr. Celso E Gomez-Sanchez             | -                     | Mouse       |
| NURR1 (N-20)                   | Santacruz Biotechnologies                          | sc-991                | Rabbit      |
| Total ATF2                     | Santacruz Biotechnologies                          | sc-6233               | Rabbit      |
| Phospho-ATF2<br>(Thr71) (11G2) | Cell Signaling Technology                          | 5112                  | Rabbit      |
| Total StAR                     | Developed and kindly donated by Dr. Douglas Stocco | -                     | Rabbit      |
| Phospho-StAR<br>(Ser195)       | Developed and kindly donated by Dr. Douglas Stocco | -                     | Rabbit      |
| GAPDH                          | Sigma Aldrich                                      | G8795                 | Mouse       |
| Lamin A/C 4C11                 | Cell Signaling                                     | 4777                  | Mouse       |
