# Supplementary material
Source: PubMed Central journal article supplement (PMC5027885)
Supplement: NIHMS788178-supplement-04.pdf [file NIHMS788178-supplement-04.pdf]

**Supplemental Table 2.** Method details for measurement of steroids by LC-MS/MS

| <b>Steroid</b>         | <b>RT (min)</b> | <b>Precursor/product ions (m/z<sup>a</sup>)</b> | <b>Internal Standard</b>  | <b>LOD ng/dL</b> | <b>Linear Regression (R<sup>2</sup>)</b> |
|------------------------|-----------------|-------------------------------------------------|---------------------------|------------------|------------------------------------------|
| Progesterone           | 11.8            | 315.2/97                                        | Progesterone -d9          | 1.2              | 0.9986                                   |
| 17-OH Progesterone     | 9.9             | 331.2/97                                        | 17-OH Progesterone-d8     | 1.9              | 0.9964                                   |
| 11-deoxycorticosterone | 10.8            | 331.2/109                                       | 11-deoxycorticosterone-d8 | 2                | 0.9965                                   |
| 11-deoxycrtisol        | 8.9             | 347.2/97                                        | 11-deoxycrtisol-d5        | 2                | 0.9953                                   |
| Corticosterone         | 9.2             | 347.2/121                                       | Corticosterone-d8         | 0.7              | 0.9990                                   |
| Aldosterone            | 8.6             | 361.2/343.1                                     | aldosterone-d7            | 2                | 0.9993                                   |
| Cortisol               | 7.1             | 363/121                                         | Cortisol -d4              | 1                | 0.9992                                   |
| 18-hydroxycortisol     | 6.0             | 379.2/267                                       | Cortisol -d4              | 1.2              | 0.9992                                   |
| 18-oxocortisol         | 6.5             | 377.2/313                                       | Cortisol -d4              | 1.2              | 0.9965                                   |

<sup>a</sup> m/z , mass to charge ratio; RT, retention time; LOD, Limit of detection (calculated by signal-to-noise ratio of 3).
