# Supplementary material
Source: PubMed Central journal article supplement (PMC5027885)
Supplement: NIHMS788178-supplement-05.pdf [file NIHMS788178-supplement-05.pdf]

## 1 **Supplemental Methods**

### 2 **Protein isolation and western analysis**

3 Total protein from each well was isolated by lysing cells in MPER® Mammalian Lysis  
4 buffer (Thermo Pierce) by repeated pipetting for homogenization. At the termination of  
5 treatments, nuclear protein isolation was accomplished by rinsing cells twice with PBS  
6 containing Halt™ Protease Inhibitor Cocktail (Thermo Scientific) and PhosSTOP  
7 EASYpack (phosphatase inhibitor cocktail, Roche). Nuclear protein was isolated using  
8 the NE-PER Nuclear and Cytoplasmic Extraction reagents (Thermo Scientific). Protein  
9 was estimated using the Micro BCA Kit (Thermo Pierce). 20 µg aliquots of cell protein  
10 were stored at -80°C until use for western analysis. Protein samples were reduced by  
11 boiling at 95°C for 5 min in sample buffer containing MPER® Mammalian Lysis buffer,  
12 NuPAGE® LDS sample buffer (Life Technologies) and NuPAGE® sample reducing  
13 agent (Life Technologies), and separated on a 10% BisTris gel by electrophoresis (200  
14 V, 50 min) using the XCell SureLock system (Life Technologies). Protein bands were  
15 then transferred to an activated PVDF membrane (1.5 h, 40 V). After transfer, the  
16 membrane was incubated for 1 h at room temperature with either 5 % BSA or non-fat  
17 dry milk in Tris-buffered saline-0.1% Tween (TBST) blocking solutions. Primary and  
18 secondary antibodies were diluted using the blocking solution as the diluent. The  
19 regular ECL Kit or the ECL SuperSignal West Pico Kit (Thermo Pierce) was used for  
20 signal development. Immunodetection of β-actin (Sigma Aldrich), GAPDH (Thermo  
21 Pierce) or Lamin A/C (Santa Cruz) was used for protein normalization, as indicated.  
22 The details of the antibodies are listed in Supplementary Table 1.

### 23 **Aldosterone enzyme immunoassay**

24 The aldosterone immunoassay (Gomez-Sanchez, et al. 1987; Manolopoulou, et al.  
25 2008) was used to measure aldosterone in time course, verapamil dose response  
26 experiments and primary human adrenal cell culture experiments. For all other  
27 experiments, all steroids including aldosterone were measured by the LC-MS/MS.  
28 Briefly, 96-well costar plates were coated overnight in goat anti-mouse IgG. After three  
29 washes in 1X PBS with 0.1% Tween, the plate was incubated in aldosterone antibody  
30 for 1 h. Aldosterone standards or media samples (50  $\mu$ L) were added to the plate,  
31 followed by biotin-linked competitive aldosterone, and incubated for 1 h. At the end of  
32 the incubation, the plate was washed and incubated in horseradish peroxidase for 30  
33 min. Chromogen was developed by incubation with TMB substrate for 30 min. The  
34 reaction was stopped by the addition of 1N sulfuric acid and read on a colorimeter at  
35 450 nM.

### 36 **Statistical analysis**

37 Results were calculated as means  $\pm$  SEM from at least three independent experiments.  
38 One-way ANOVA was used for statistical analyses using SigmaPlot 12.5 software  
39 (Systat Software, Inc). Significance was accepted for  $p \leq 0.05$ .

40

## 41 **Supplementary figure legends**

42 **Supplemental Figure S1. Doxycycline treatment does not effect wild-type HAC15**  
43 **cell gene expression of (A) *KCNJ5*, (B) *CYP11B2* or (C) *NURR1*.** Control wildtype  
44 were incubated with 1 µg/ml doxycycline and analyzed by real time qPCR. Doxycycline  
45 itself did not have any effect on endogenous *KCNJ5* (*Panel A*), *CYP11B2* (*Panel B*) or  
46 *NURR1* (*Panel C*) mRNA expression. *CYP11B2* agonist K<sup>+</sup> was used as a positive  
47 control. Results represent the means ± S.E.M. of three independent experiments.  
48 Statistical analyses were performed using one-way ANOVA (\*p<0.05 versus basal).

49 **Supplemental Figure S2. Effect of *KCNJ5*<sup>T158A</sup> expression in primary cultures of**  
50 **human adrenal ZF/ZR cells.** Primary cultures of ZF/ZR cells were transduced with  
51 lentiviruses constitutively expressing GFP (control, multiplicity of infection or MOI 10) or  
52 *KCNJ5*<sup>T158A</sup> (at indicated MOI doses). The effect of *KCNJ5*<sup>T158A</sup> on gene expression  
53 levels for m*KCNJ5* (*Panel A*), *CYP11B2* (*Panel B*) and aldosterone production (*Panel*  
54 *C*) were analyzed. Results represent the means ± S.E.M. of three independent  
55 experiments. Statistical analyses were performed using one-way ANOVA (\*p<0.05  
56 versus basal).

## 57 **References**

58 **Gomez-Sanchez CE, Foeking MF, Ferris MW, Chavarri MR, Uribe L & Gomez-**  
59 **Sanchez EP 1987 The production of monoclonal antibodies against aldosterone.**  
60 ***Steroids* 49 581-587.**  
61 **Manolopoulou J, Bielhuby M, Caton SJ, Gomez-Sanchez CE, Renner-Mueller I, Wolf**  
62 **E, Lichtenauer UD, Beuschlein F, Hoeflich A & Bidlingmaier M 2008 A highly sensitive**

63 immunofluorometric assay for the measurement of aldosterone in small sample  
64 volumes: validation in mouse serum. *J Endocrinol* **196** 215-224.

65
