# Supplementary material
Source: PubMed Central journal article supplement (PMC5027885)

**A**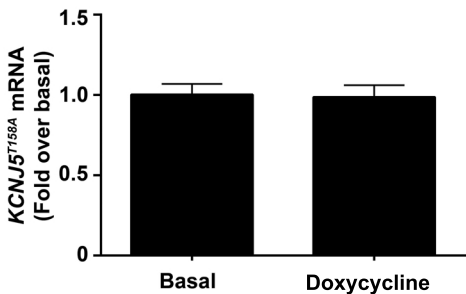**B**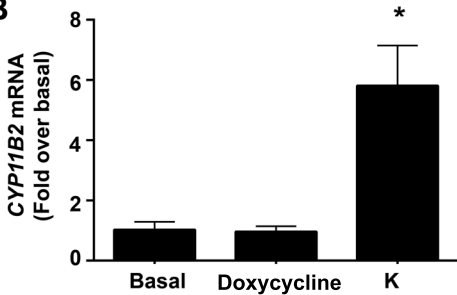**C**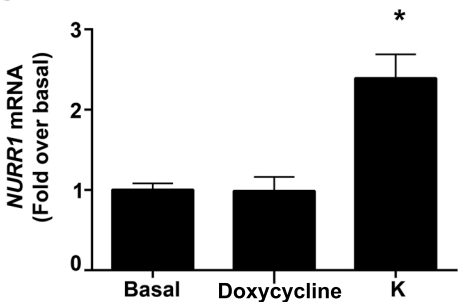

Supplement: NIHMS788178-supplement-01.pdf [file NIHMS788178-supplement-01.pdf]

**A**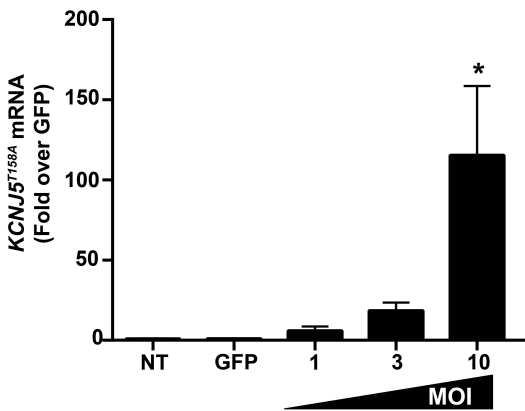**B**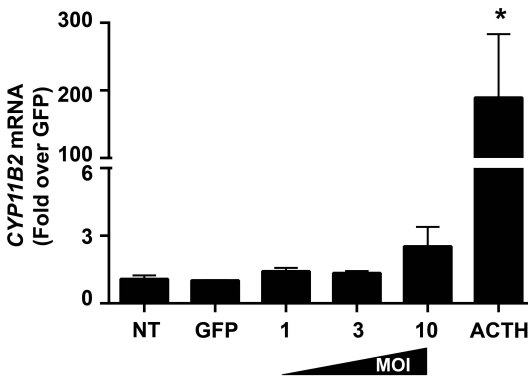**C**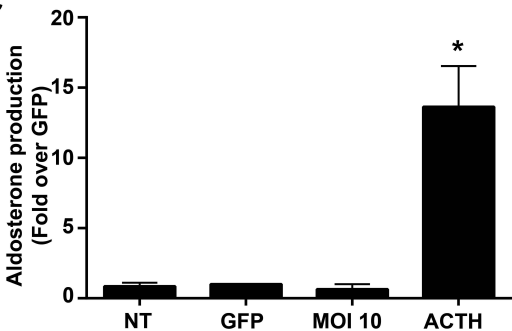

Supplement: NIHMS788178-supplement-02.pdf [file NIHMS788178-supplement-02.pdf]
